# Supplementary material for: The Relationship Between Recommended and None Recommended Food Scores on Cardiovascular Risk Factors in Obese and Overweight Adult Women: A Cross Sectional Study
Source: Research Square preprint supplement (doi:10.21203/rs.3.rs-123067/v1), 2020-12-21
Supplement: Supplementary file 1 [file 934d41895e0ddb0159852de6.docx]

**The relationship between recommended and none recommended food scores on cardiovascular risk factors in obese and overweight adult women: A Cross-sectional Study**

Maryam Sabbaria, Atieh Mirzababaeib, Farideh Shirasebb, Khadijeh Mirzaeib,*

a Faculty of Medical Sciences and Technologies, Islamic Azad University, Science and Research Branch of Tehran, Tehran, Iran

b Department of Community Nutrition, School of Nutritional Sciences and Dietetics, Tehran University of Medical Sciences (TUMS), Tehran, Iran

* Corresponding Author: Khadijeh Mirzaei, PhD

Associate Professor in Tehran University of Medical Sciences (TUMS), Department of Community Nutrition, School of Nutritional Sciences and Dietetics, Tehran University of Medical Sciences (TUMS), Tehran, Iran

P.O. Box: 14155-6117, Tehran, Iran

Telephone: +98-21-88955569 Fax: +98-21-88984861

Email: mirzaei_kh@tums.ac.ir

**147- item semi-quantitative food frequency questionnaire (FFQ)**

|  | Food Items | Amount | day | weak | month | year |
| --- | --- | --- | --- | --- | --- | --- |
| 1 | Lavash Bread | A number |  |  |  |  |
| 2 | Barbari bread | A number |  |  |  |  |
| 3 | sangak bread | A number |  |  |  |  |
| 4 | Taftoun bread | A number |  |  |  |  |
| 5 | Baguette bread | A number |  |  |  |  |
| 6 | Cooked rice | A dish |  |  |  |  |
| 7 | Baked pasta | A spatula |  |  |  |  |
| 8 | potato | A number |  |  |  |  |
| 9 | French fries | A number |  |  |  |  |
| 10 | Cooked vermicelli | A glass |  |  |  |  |
| 11 | Noodle soup | A glass |  |  |  |  |
| 12 | Biscuits | A number |  |  |  |  |
| 13 | Cracker | A number |  |  |  |  |
| 14 | Cake | A number |  |  |  |  |
| 15 | Corn | A number |  |  |  |  |
| 16 | Cooked barley | A cup |  |  |  |  |
| 17 | Lentils | A cup |  |  |  |  |
| 18 | Beans | A cup |  |  |  |  |
| 19 | Chickpeas | A cup |  |  |  |  |
| 20 | Fava beans | A cup |  |  |  |  |
| 21 | Soy | A cup |  |  |  |  |
| 22 | Mung bean | A cup |  |  |  |  |
| 23 | split peas | A cup |  |  |  |  |
| 24 | Beef | one piece |  |  |  |  |
| 25 | Lamb meat | one piece |  |  |  |  |
| 26 | Minced meat | A spoon |  |  |  |  |
| 27 | chicken | A piece |  |  |  |  |
| 28 | fish | A piece |  |  |  |  |
| 29 | Tuna | A can |  |  |  |  |
| 30 | liver and kidney | A skewer |  |  |  |  |
| 31 | Hamburger | A number |  |  |  |  |
| 32 | Ham | one piece |  |  |  |  |
| 33 | Sausage | A number |  |  |  |  |
| 34 | Egg | A number |  |  |  |  |
| 35 | Tripe | A piece |  |  |  |  |
| 36 | Tongue cooked | A number |  |  |  |  |
| 37 | Brain cooked | A number |  |  |  |  |
| 38 | Head cooked | A piece |  |  |  |  |
| 39 | cooked leg of lamb | A number |  |  |  |  |
| 40 | Pizza | A number |  |  |  |  |
| 41 | Low fat milk | A glass |  |  |  |  |
| 42 | High fat milk | A glass |  |  |  |  |
| 43 | chocolate milk | A glass |  |  |  |  |
| 44 | Strained yogurt | A bowl |  |  |  |  |
| 45 | Low fat yogurt | A bowl |  |  |  |  |
| 46 | High fat yogurt | A bowl |  |  |  |  |
| 47 | Cheese | a box of matches |  |  |  |  |
| 48 | cream cheese | a box of matches |  |  |  |  |
| 49 | Doogh Drink | A glass |  |  |  |  |
| 50 | Cream | A spoon |  |  |  |  |
| 51 | Traditional ice cream | A glass |  |  |  |  |
| 52 | Ice cream | A number |  |  |  |  |
| 53 | Butter | a box of matches |  |  |  |  |
| 54 | Margarine | a box of matches |  |  |  |  |
| 55 | Curd | A spoon |  |  |  |  |
| 56 | Lettuce | A glass |  |  |  |  |
| 57 | Tomato | A number |  |  |  |  |
| 58 | Cucumber | A number |  |  |  |  |
| 59 | vegetables | A glass |  |  |  |  |
| 60 | Cooked vegetables | A glass |  |  |  |  |
| 61 | Pumpkin | A piece |  |  |  |  |
| 62 | Squash | A number |  |  |  |  |
| 63 | Eggplant | A number |  |  |  |  |
| 64 | Celery | A cup |  |  |  |  |
| 65 | Cooked Peas | A cup |  |  |  |  |
| 66 | Green beans | A cup |  |  |  |  |
| 67 | Raw carrot | A number |  |  |  |  |
| 68 | Cooked carrot | A number |  |  |  |  |
| 69 | Garlic | A number |  |  |  |  |
| 70 | Raw onion | A number |  |  |  |  |
| 71 | fried onion | A spoon |  |  |  |  |
| 72 | Cabbage | A bowl |  |  |  |  |
| 73 | Bell pepper | A number |  |  |  |  |
| 74 | Cooked spinach | A glass |  |  |  |  |
| 75 | Turnip | A number |  |  |  |  |
| 76 | Green pepper | A number |  |  |  |  |
| 77 | ketchup | A spoon |  |  |  |  |
| 78 | Pickled Vegetables | A bowl |  |  |  |  |
| 79 | Salty Pickled Vegetables | A bowl |  |  |  |  |
| 80 | Pickle | A number |  |  |  |  |
| 81 | cantaloupe | A number |  |  |  |  |
| 82 | Melon | A number |  |  |  |  |
| 83 | Watermelon | A number |  |  |  |  |
| 84 | Pear | A number |  |  |  |  |
| 85 | Apricot | A number |  |  |  |  |
| 86 | Cherries | A number |  |  |  |  |
| 87 | Apple | A number |  |  |  |  |
| 88 | Peach | A number |  |  |  |  |
| 89 | Nectarine | A number |  |  |  |  |
| 90 | Sour Green Plums | A number |  |  |  |  |
| 91 | Fresh fig | A number |  |  |  |  |
| 92 | Dried fig | A number |  |  |  |  |
| 93 | Grape | A number |  |  |  |  |
| 94 | Kiwi | A number |  |  |  |  |
| 95 | Grapefruit | A number |  |  |  |  |
| 96 | Orange | A number |  |  |  |  |
| 97 | persimmon | A number |  |  |  |  |
| 98 | Tangerine | A number |  |  |  |  |
| 99 | Pomegranate | A number |  |  |  |  |
| 100 | Date palm | A number |  |  |  |  |
| 101 | Plums | A number |  |  |  |  |
| 102 | Strawberry | A number |  |  |  |  |
| 103 | Banana | A number |  |  |  |  |
| 104 | Lemon | A number |  |  |  |  |
| 105 | Lime | A number |  |  |  |  |
| 106 | Orange juice | A glass |  |  |  |  |
| 107 | Apple juice | A glass |  |  |  |  |
| 108 | cantaloupe juice | A glass |  |  |  |  |
| 109 | Raisins | A spoon |  |  |  |  |
| 110 | White Mulberry | A dish |  |  |  |  |
| 111 | Dried white Mulberry | A number |  |  |  |  |
| 112 | Dried Fruit | A number |  |  |  |  |
| 113 | Olive | A number |  |  |  |  |
| 114 | Fruit compote | A number |  |  |  |  |
| 115 | Packaged juice | A number |  |  |  |  |
| 116 | Solid vegetable oil | A spoon |  |  |  |  |
| 117 | Liquid oil | A spoon |  |  |  |  |
| 118 | Olive oil | A spoon |  |  |  |  |
| 119 | Animal oil | A spoon |  |  |  |  |
| 120 | mayonnaise sauce | A spoon |  |  |  |  |
| 121 | Peanut | A number |  |  |  |  |
| 122 | Almond | A number |  |  |  |  |
| 123 | walnut | A number |  |  |  |  |
| 124 | Pistachio | A number |  |  |  |  |
| 125 | Hazelnut | A number |  |  |  |  |
| 126 | Pumpkin Seeds | A bowl |  |  |  |  |
| 127 | sugar cube | A number |  |  |  |  |
| 128 | Sugar | A spoon |  |  |  |  |
| 129 | Honey | A spoon |  |  |  |  |
| 130 | Jam | A spoon |  |  |  |  |
| 131 | Soft drinks | A glass |  |  |  |  |
| 132 | Cookie | A number |  |  |  |  |
| 133 | Creamy sweets | A number |  |  |  |  |
| 134 | Gaz(A kind of sweet) | A number |  |  |  |  |
| 135 | Sohan(A kind of sweet) | A number |  |  |  |  |
| 136 | Cheetos | A number |  |  |  |  |
| 137 | Chocolate | A number |  |  |  |  |
| 138 | Tea | A glass |  |  |  |  |
| 139 | Salt | A spoon |  |  |  |  |
| 140 | Chips | A number |  |  |  |  |
| 141 | Coffee | A cup |  |  |  |  |
| 142 | Lemon juice | A spoon |  |  |  |  |
| 143 | Candy | A number |  |  |  |  |
| 144 | Cooked mushroom | A cup |  |  |  |  |
| 145 | Halva (A kind of sweet) | A spoon |  |  |  |  |
| 146 | Halva shekari (A kind of sweet) | A spoon |  |  |  |  |
| 147 | Spices | A spoon |  |  |  |  |

**international physical activity questionnaire (ipaq)**

**
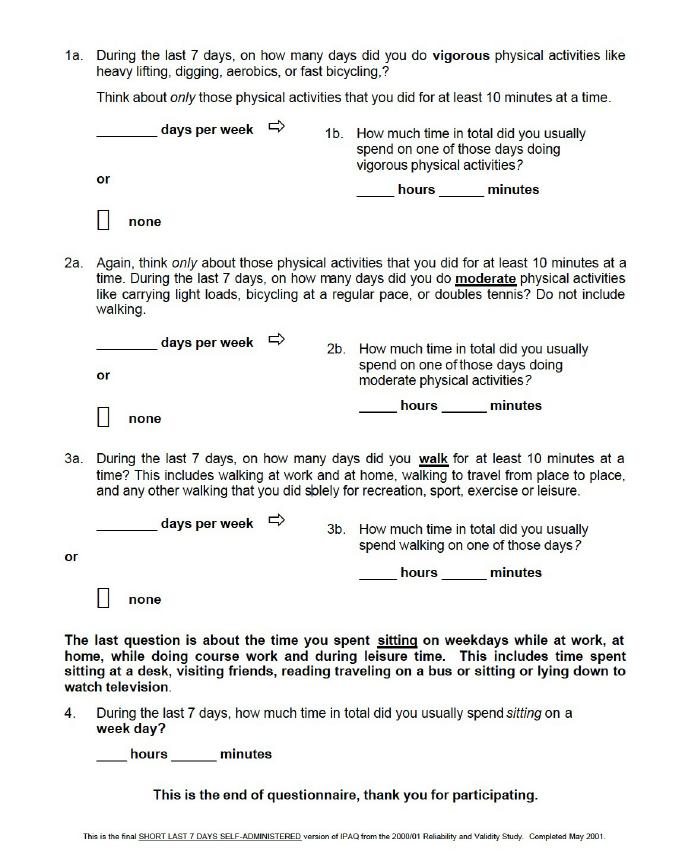
**
